# Supplementary material
Source: MDPI journal article supplement (https://www.mdpi.com/2073-4441/13/14/1966)
Supplement: s1 [file s1]

## Supplementary Materials

Table S1. List of Seveso establishments exposed to different level of hazard flood and associated information (potential of release of hazardous materials, presence of vulnerable items in each buffer area and categories of population).

| IDplant | Hazard               | Release           | Damage    | Rnatech           | Cat1 | Cat2 | Cat3 |
|---------|----------------------|-------------------|-----------|-------------------|------|------|------|
| 1       | <i>Pe1; Pe2</i>      | <i>P2; P3</i>     | <i>D1</i> | <i>R2; R3</i>     | 1    | 0    | 0    |
| 2       | <i>Pe1; Pe2</i>      | <i>P2; P3</i>     | <i>D1</i> | <i>R2; R3</i>     | 0    | 0    | 0    |
| 3       | <i>Pe1; Pe2</i>      | <i>P2; P3</i>     | <i>D2</i> | <i>R2; R3</i>     | 0    | 0    | 0    |
| 4       | <i>Pe1; Pe2</i>      | <i>P2; P3</i>     | <i>D1</i> | <i>R2; R3</i>     | 0    | 0    | 0    |
| 5       | <i>Pe1; Pe2</i>      | <i>P2; P3</i>     | <i>D1</i> | <i>R2; R3</i>     | 0    | 0    | 0    |
| 6       | <i>Pe1; Pe2</i>      | <i>P2; P3</i>     | <i>D2</i> | <i>R2; R3</i>     | 0    | 0    | 0    |
| 7       | <i>Pe2</i>           | <i>P2</i>         | <i>D2</i> | <i>R2</i>         | 1    | 0    | 0    |
| 8       | <i>Pe2</i>           | <i>P2</i>         | <i>D1</i> | <i>R2</i>         | 1    | 0    | 0    |
| 9       | <i>Pe2</i>           | <i>P2</i>         | <i>D1</i> | <i>R2</i>         | 0    | 1    | 0    |
| 10      | <i>Pe1; Pe2</i>      | <i>P2; P3</i>     | <i>D1</i> | <i>R2; R3</i>     | 0    | 0    | 0    |
| 11      | <i>Pe1; Pe2</i>      | <i>P2; P3</i>     | <i>D2</i> | <i>R2; R3</i>     | 0    | 0    | 0    |
| 12      | <i>Pe1; Pe2</i>      | <i>P2; P3</i>     | <i>D2</i> | <i>R2; R3</i>     | 0    | 0    | 0    |
| 13      | <i>Pe1; Pe2</i>      | <i>P2; P3</i>     | <i>D2</i> | <i>R2; R3</i>     | 0    | 0    | 0    |
| 14      | <i>Pe1; Pe2</i>      | <i>P2; P3</i>     | <i>D2</i> | <i>R2; R3</i>     | 1    | 0    | 0    |
| 15      | <i>Pe1; Pe2</i>      | <i>P2; P3</i>     | <i>D2</i> | <i>R2; R3</i>     | 1    | 0    | 0    |
| 16      | <i>Pe1; Pe2</i>      | <i>P2; P3</i>     | <i>D2</i> | <i>R2; R3</i>     | 0    | 0    | 0    |
| 17      | <i>Pe1; Pe2</i>      | <i>P2; P3</i>     | <i>D2</i> | <i>R2; R3</i>     | 0    | 0    | 0    |
| 18      | <i>Pe1; Pe2</i>      | <i>P2; P3</i>     | <i>D2</i> | <i>R2; R3</i>     | 0    | 0    | 0    |
| 19      | <i>Pe1; Pe2</i>      | <i>P2; P3</i>     | <i>D2</i> | <i>R2; R3</i>     | 0    | 0    | 0    |
| 20      | <i>Pe1; Pe2</i>      | <i>P2; P3</i>     | <i>D2</i> | <i>R2; R3</i>     | 0    | 0    | 0    |
| 21      | <i>Pe1; Pe2</i>      | <i>P2; P3</i>     | <i>D2</i> | <i>R2; R3</i>     | 0    | 0    | 0    |
| 22      | <i>Pe1; Pe2; Pe3</i> | <i>P1; P2; P3</i> | <i>D1</i> | <i>R1; R2; R3</i> | 0    | 0    | 0    |
| 23      | <i>Pe1; Pe2</i>      | <i>P2; P3</i>     | <i>D1</i> | <i>R2; R3</i>     | 0    | 0    | 0    |
| 24      | <i>Pe1; Pe2</i>      | <i>P2; P3</i>     | <i>D2</i> | <i>R2; R3</i>     | 1    | 0    | 0    |
| 25      | <i>Pe1; Pe2</i>      | <i>P2; P3</i>     | <i>D2</i> | <i>R2; R3</i>     | 1    | 0    | 0    |
| 26      | <i>Pe1; Pe2</i>      | <i>P2; P3</i>     | <i>D2</i> | <i>R2; R3</i>     | 1    | 0    | 0    |
| 27      | <i>Pe1; Pe2</i>      | <i>P2; P3</i>     | <i>D2</i> | <i>R2; R3</i>     | 1    | 0    | 0    |
| 28      | <i>Pe1; Pe2</i>      | <i>P2; P3</i>     | <i>D2</i> | <i>R2; R3</i>     | 0    | 0    | 0    |
| 29      | <i>Pe1; Pe2</i>      | <i>P2; P3</i>     | <i>D2</i> | <i>R2; R3</i>     | 1    | 0    | 0    |
| 30      | <i>Pe1; Pe2</i>      | <i>P2; P3</i>     | <i>D2</i> | <i>R2; R3</i>     | 1    | 0    | 0    |
| 31      | <i>Pe1; Pe2</i>      | <i>P2; P3</i>     | <i>D2</i> | <i>R2; R3</i>     | 1    | 0    | 0    |
| 32      | <i>Pe1; Pe2</i>      | <i>P2; P3</i>     | <i>D2</i> | <i>R2; R3</i>     | 1    | 0    | 0    |
| 33      | <i>Pe1; Pe2</i>      | <i>P2; P3</i>     | <i>D2</i> | <i>R2; R3</i>     | 1    | 0    | 0    |
| 34      | <i>Pe2</i>           | <i>P2</i>         | <i>D1</i> | <i>R2</i>         | 1    | 1    | 0    |
| 35      | <i>Pe1; Pe2</i>      | <i>P2; P3</i>     | <i>D1</i> | <i>R2; R3</i>     | 0    | 0    | 0    |
| 36      | <i>Pe1; Pe2</i>      | <i>P2; P3</i>     | <i>D2</i> | <i>R2; R3</i>     | 1    | 0    | 0    |
| 37      | <i>Pe1; Pe2</i>      | <i>P2; P3</i>     | <i>D2</i> | <i>R2; R3</i>     | 1    | 0    | 0    |
| 38      | <i>Pe1; Pe2</i>      | <i>P2; P3</i>     | <i>D2</i> | <i>R2; R3</i>     | 1    | 0    | 0    |
| 39      | <i>Pe1; Pe2</i>      | <i>P2; P3</i>     | <i>D2</i> | <i>R2; R3</i>     | 1    | 0    | 0    |
| 40      | <i>Pe1; Pe2</i>      | <i>P2; P3</i>     | <i>D2</i> | <i>R2; R3</i>     | 1    | 0    | 0    |
| 41      | <i>Pe1; Pe2</i>      | <i>P2; P3</i>     | <i>D2</i> | <i>R2; R3</i>     | 1    | 0    | 0    |
| 42      | <i>Pe1; Pe2</i>      | <i>P2; P3</i>     | <i>D2</i> | <i>R2; R3</i>     | 1    | 0    | 0    |
| 43      | <i>Pe1; Pe2</i>      | <i>P2; P3</i>     | <i>D2</i> | <i>R2; R3</i>     | 1    | 1    | 0    |
| 44      | <i>Pe1; Pe2</i>      | <i>P2; P3</i>     | <i>D2</i> | <i>R2; R3</i>     | 1    | 0    | 0    |

|    |                      |                   |           |                   |   |   |   |
|----|----------------------|-------------------|-----------|-------------------|---|---|---|
| 45 | <i>Pe1; Pe2</i>      | <i>P2; P3</i>     | <i>D2</i> | <i>R2; R3</i>     | 0 | 0 | 0 |
| 46 | <i>Pe1; Pe2</i>      | <i>P2; P3</i>     | <i>D2</i> | <i>R2; R3</i>     | 0 | 0 | 0 |
| 47 | <i>Pe2</i>           | <i>P2</i>         | <i>D1</i> | <i>R2</i>         | 1 | 1 | 1 |
| 48 | <i>Pe1</i>           | <i>P3</i>         | <i>D1</i> | <i>R3</i>         | 1 | 1 | 0 |
| 49 | <i>Pe1</i>           | <i>P3</i>         | <i>D1</i> | <i>R3</i>         | 1 | 1 | 0 |
| 50 | <i>Pe2</i>           | <i>P2</i>         | <i>D2</i> | <i>R2</i>         | 1 | 1 | 0 |
| 51 | <i>Pe2</i>           | <i>P2</i>         | <i>D1</i> | <i>R2</i>         | 0 | 0 | 0 |
| 52 | <i>Pe2</i>           | <i>P2</i>         | <i>D1</i> | <i>R2</i>         | 0 | 0 | 0 |
| 53 | <i>Pe1; Pe2; Pe3</i> | <i>P1; P2; P3</i> | <i>D1</i> | <i>R1; R2; R3</i> | 0 | 0 | 0 |
| 54 | <i>Pe2</i>           | <i>P2</i>         | <i>D1</i> | <i>R2</i>         | 0 | 0 | 0 |
| 55 | <i>Pe2</i>           | <i>P2</i>         | <i>D2</i> | <i>R2</i>         | 0 | 1 | 0 |
| 56 | <i>Pe2</i>           | <i>P2</i>         | <i>D1</i> | <i>R2</i>         | 1 | 0 | 0 |
| 57 | <i>Pe1; Pe2; Pe3</i> | <i>P1; P2; P3</i> | <i>D2</i> | <i>R2; R3</i>     | 0 | 0 | 0 |
| 58 | <i>Pe2</i>           | <i>P2</i>         | <i>D1</i> | <i>R2</i>         | 0 | 0 | 0 |
| 59 | <i>Pe2</i>           | <i>P2</i>         | <i>D1</i> | <i>R2</i>         | 1 | 0 | 0 |
| 60 | <i>Pe1; Pe2</i>      | <i>P2; P3</i>     | <i>D1</i> | <i>R2; R3</i>     | 0 | 0 | 0 |
| 61 | <i>Pe1; Pe2</i>      | <i>P2; P3</i>     | <i>D1</i> | <i>R2; R3</i>     | 0 | 0 | 0 |
| 62 | <i>Pe1</i>           | <i>P3</i>         | <i>D1</i> | <i>R3</i>         | 0 | 0 | 0 |
| 63 | <i>Pe1</i>           | <i>P3</i>         | <i>D2</i> | <i>R3</i>         | 0 | 0 | 0 |
| 64 | <i>Pe1</i>           | <i>P3</i>         | <i>D2</i> | <i>R3</i>         | 0 | 0 | 0 |
| 65 | <i>Pe1</i>           | <i>P3</i>         | <i>D1</i> | <i>R3</i>         | 0 | 0 | 0 |
| 66 | <i>Pe1</i>           | <i>P3</i>         | <i>D2</i> | <i>R3</i>         | 0 | 0 | 0 |
| 67 | <i>Pe1</i>           | <i>P3</i>         | <i>D2</i> | <i>R3</i>         | 1 | 0 | 0 |
| 68 | <i>Pe1</i>           | <i>P3</i>         | <i>D2</i> | <i>R3</i>         | 0 | 0 | 0 |
| 69 | <i>Pe1</i>           | <i>P3</i>         | <i>D1</i> | <i>R3</i>         | 1 | 0 | 0 |
| 70 | <i>Pe1</i>           | <i>P3</i>         | <i>D2</i> | <i>R3</i>         | 1 | 0 | 0 |
| 71 | <i>Pe1; Pe2</i>      | <i>P2; P3</i>     | <i>D2</i> | <i>R2; R3</i>     | 1 | 1 | 1 |
| 72 | <i>Pe1; Pe2; Pe3</i> | <i>P1; P2; P3</i> | <i>D1</i> | <i>R2; R3</i>     | 1 | 1 | 1 |
| 73 | <i>Pe1</i>           | <i>P3</i>         | <i>D2</i> | <i>R3</i>         | 1 | 0 | 0 |
| 74 | <i>Pe1</i>           | <i>P3</i>         | <i>D2</i> | <i>R3</i>         | 1 | 0 | 0 |
| 75 | <i>Pe1</i>           | <i>P3</i>         | <i>D2</i> | <i>R3</i>         | 1 | 0 | 0 |
| 76 | <i>Pe1</i>           | <i>P3</i>         | <i>D2</i> | <i>R3</i>         | 0 | 0 | 0 |
| 77 | <i>Pe1</i>           | <i>P3</i>         | <i>D2</i> | <i>R3</i>         | 1 | 0 | 0 |
| 78 | <i>Pe1</i>           | <i>P3</i>         | <i>D1</i> | <i>R3</i>         | 1 | 0 | 0 |
| 79 | <i>Pe1; Pe2</i>      | <i>P2; P3</i>     | <i>D2</i> | <i>R2; R3</i>     | 0 | 0 | 0 |
| 80 | <i>Pe1</i>           | <i>P3</i>         | <i>D2</i> | <i>R3</i>         | 1 | 0 | 0 |
| 81 | <i>Pe1</i>           | <i>P3</i>         | <i>D2</i> | <i>R3</i>         | 1 | 0 | 0 |
| 82 | <i>Pe1</i>           | <i>P3</i>         | <i>D2</i> | <i>R3</i>         | 1 | 0 | 0 |
| 83 | <i>Pe1</i>           | <i>P3</i>         | <i>D2</i> | <i>R3</i>         | 1 | 0 | 0 |
| 84 | <i>Pe1; Pe2; Pe3</i> | <i>P1; P2; P3</i> | <i>D1</i> | <i>R2; R3</i>     | 1 | 1 | 1 |
| 85 | <i>Pe1</i>           | <i>P3</i>         | <i>D2</i> | <i>R3</i>         | 1 | 0 | 0 |
| 86 | <i>Pe1; Pe2</i>      | <i>P2; P3</i>     | <i>D1</i> | <i>R2; R3</i>     | 0 | 0 | 0 |
| 87 | <i>Pe1; Pe2</i>      | <i>P2; P3</i>     | <i>D1</i> | <i>R2; R3</i>     | 0 | 0 | 0 |
| 88 | <i>Pe1</i>           | <i>P3</i>         | <i>D1</i> | <i>R3</i>         | 1 | 0 | 0 |
| 89 | <i>Pe1</i>           | <i>P3</i>         | <i>D1</i> | <i>R3</i>         | 1 | 0 | 0 |
| 90 | <i>Pe1</i>           | <i>P3</i>         | <i>D1</i> | <i>R3</i>         | 0 | 0 | 0 |
| 91 | <i>Pe1; Pe2</i>      | <i>P2; P3</i>     | <i>D1</i> | <i>R2; R3</i>     | 1 | 1 | 0 |
| 92 | <i>Pe1</i>           | <i>P3</i>         | <i>D1</i> | <i>R3</i>         | 1 | 0 | 0 |
| 93 | <i>Pe1; Pe2; Pe3</i> | <i>P1; P2; P3</i> | <i>D1</i> | <i>R1; R2; R3</i> | 0 | 0 | 0 |

|     |                      |                   |           |               |   |   |   |
|-----|----------------------|-------------------|-----------|---------------|---|---|---|
| 94  | <i>Pe1</i>           | <i>P3</i>         | <i>D1</i> | <i>R3</i>     | 1 | 0 | 0 |
| 95  | <i>Pe1; Pe2</i>      | <i>P2; P3</i>     | <i>D2</i> | <i>R2; R3</i> | 1 | 0 | 0 |
| 96  | <i>Pe2</i>           | <i>P2</i>         | <i>D1</i> | <i>R2</i>     | 1 | 1 | 0 |
| 97  | <i>Pe2; Pe3;</i>     | <i>P1; P2;</i>    | <i>D1</i> | <i>R1; R2</i> | 0 | 0 | 0 |
| 98  | <i>Pe2;Pe3;</i>      | <i>P1; P2;</i>    | <i>D1</i> | <i>R2</i>     | 0 | 0 | 0 |
| 99  | <i>Pe2;Pe3;</i>      | <i>P1; P2;</i>    | <i>D1</i> | <i>R2</i>     | 1 | 1 | 1 |
| 100 | <i>Pe1; Pe2</i>      | <i>P2; P3</i>     | <i>D1</i> | <i>R2; R3</i> | 0 | 0 | 0 |
| 101 | <i>Pe1</i>           | <i>P3</i>         | <i>D1</i> | <i>R3</i>     | 1 | 0 | 0 |
| 102 | <i>Pe1</i>           | <i>P3</i>         | <i>D1</i> | <i>R3</i>     | 1 | 0 | 0 |
| 103 | <i>Pe1</i>           | <i>P3</i>         | <i>D1</i> | <i>R3</i>     | 0 | 0 | 0 |
| 104 | <i>Pe1</i>           | <i>P3</i>         | <i>D1</i> | <i>R3</i>     | 1 | 0 | 0 |
| 105 | <i>Pe1</i>           | <i>P3</i>         | <i>D1</i> | <i>R3</i>     | 1 | 0 | 0 |
| 106 | <i>Pe1</i>           | <i>P3</i>         | <i>D1</i> | <i>R3</i>     | 1 | 0 | 0 |
| 107 | <i>Pe1; Pe2; Pe3</i> | <i>P1; P2; P3</i> | <i>D1</i> | <i>R2; R3</i> | 1 | 1 | 1 |
| 108 | <i>Pe1</i>           | <i>P3</i>         | <i>D1</i> | <i>R3</i>     | 1 | 1 | 0 |
| 109 | <i>Pe1</i>           | <i>P3</i>         | <i>D1</i> | <i>R3</i>     | 1 | 1 | 0 |
| 110 | <i>Pe1</i>           | <i>P3</i>         | <i>D1</i> | <i>R3</i>     | 1 | 0 | 0 |
| 111 | <i>Pe1</i>           | <i>P3</i>         | <i>D1</i> | <i>R3</i>     | 1 | 0 | 0 |
| 112 | <i>Pe1; Pe2</i>      | <i>P2; P3</i>     | <i>D1</i> | <i>R2; R3</i> | 1 | 1 | 0 |
| 113 | <i>Pe1</i>           | <i>P3</i>         | <i>D1</i> | <i>R3</i>     | 1 | 0 | 0 |
| 114 | <i>Pe1</i>           | <i>P3</i>         | <i>D1</i> | <i>R3</i>     | 0 | 0 | 0 |
| 115 | <i>Pe1</i>           | <i>P3</i>         | <i>D1</i> | <i>R3</i>     | 0 | 0 | 0 |
| 116 | <i>Pe1</i>           | <i>P3</i>         | <i>D1</i> | <i>R3</i>     | 0 | 0 | 0 |
| 117 | <i>Pe1</i>           | <i>P3</i>         | <i>D1</i> | <i>R3</i>     | 0 | 0 | 0 |
| 118 | <i>Pe1</i>           | <i>P3</i>         | <i>D1</i> | <i>R3</i>     | 1 | 1 | 1 |
| 119 | <i>Pe1</i>           | <i>P3</i>         | <i>D1</i> | <i>R3</i>     | 1 | 1 | 0 |
| 120 | <i>Pe1</i>           | <i>P3</i>         | <i>D1</i> | <i>R3</i>     | 1 | 0 | 0 |
| 121 | <i>Pe1; Pe2</i>      | <i>P2; P3</i>     | <i>D2</i> | <i>R2; R3</i> | 0 | 0 | 0 |
| 122 | <i>Pe1</i>           | <i>P3</i>         | <i>D2</i> | <i>R3</i>     | 1 | 0 | 0 |
| 123 | <i>Pe1</i>           | <i>P3</i>         | <i>D1</i> | <i>R3</i>     | 0 | 0 | 0 |
| 124 | <i>Pe1; Pe2</i>      | <i>P2; P3</i>     | <i>D1</i> | <i>R2; R3</i> | 0 | 0 | 0 |
| 125 | <i>Pe1</i>           | <i>P3</i>         | <i>D1</i> | <i>R3</i>     | 1 | 0 | 0 |
| 126 | <i>Pe1</i>           | <i>P3</i>         | <i>D1</i> | <i>R3</i>     | 1 | 0 | 0 |
| 127 | <i>Pe1; Pe2; Pe3</i> | <i>P1; P2; P3</i> | <i>D1</i> | <i>R2; R3</i> | 1 | 1 | 1 |
| 128 | <i>Pe1; Pe2</i>      | <i>P2; P3</i>     | <i>D1</i> | <i>R2; R3</i> | 1 | 0 | 0 |
| 129 | <i>Pe1; Pe2</i>      | <i>P2; P3</i>     | <i>D1</i> | <i>R2; R3</i> | 1 | 0 | 0 |
| 130 | <i>Pe1; Pe2</i>      | <i>P2; P3</i>     | <i>D1</i> | <i>R2; R3</i> | 1 | 0 | 0 |
| 131 | <i>Pe1</i>           | <i>P3</i>         | <i>D1</i> | <i>R3</i>     | 1 | 1 | 0 |
| 132 | <i>Pe1</i>           | <i>P3</i>         | <i>D1</i> | <i>R3</i>     | 1 | 1 | 0 |
| 133 | <i>Pe1</i>           | <i>P3</i>         | <i>D1</i> | <i>R3</i>     | 1 | 1 | 1 |
| 134 | <i>Pe1</i>           | <i>P3</i>         | <i>D1</i> | <i>R3</i>     | 1 | 1 | 0 |
| 135 | <i>Pe1</i>           | <i>P3</i>         | <i>D1</i> | <i>R3</i>     | 1 | 0 | 0 |
| 136 | <i>Pe1</i>           | <i>P3</i>         | <i>D1</i> | <i>R3</i>     | 1 | 0 | 0 |
| 137 | <i>Pe1</i>           | <i>P3</i>         | <i>D1</i> | <i>R3</i>     | 1 | 0 | 0 |
| 138 | <i>Pe1</i>           | <i>P3</i>         | <i>D1</i> | <i>R3</i>     | 1 | 1 | 1 |
| 139 | <i>Pe1</i>           | <i>P3</i>         | <i>D1</i> | <i>R3</i>     | 1 | 1 | 1 |
| 140 | <i>Pe1</i>           | <i>P3</i>         | <i>D1</i> | <i>R3</i>     | 1 | 0 | 0 |
| 141 | <i>Pe1; Pe2; Pe3</i> | <i>P1; P2; P3</i> | <i>D1</i> | <i>R2; R3</i> | 1 | 1 | 1 |
| 142 | <i>Pe1</i>           | <i>P3</i>         | <i>D1</i> | <i>R3</i>     | 1 | 0 | 0 |

|     |                       |                   |           |                   |   |   |   |
|-----|-----------------------|-------------------|-----------|-------------------|---|---|---|
| 143 | <i>Pe1</i>            | <i>P3</i>         | <i>D1</i> | <i>R3</i>         | 1 | 0 | 0 |
| 144 | <i>Pe1</i>            | <i>P3</i>         | <i>D2</i> | <i>R3</i>         | 1 | 1 | 1 |
| 145 | <i>Pe1; Pe2</i>       | <i>P2; P3</i>     | <i>D1</i> | <i>R2; R3</i>     | 1 | 0 | 0 |
| 146 | <i>Pe1; Pe2</i>       | <i>P2; P3</i>     | <i>D1</i> | <i>R2; R3</i>     | 1 | 0 | 0 |
| 147 | <i>Pe1; Pe2</i>       | <i>P2; P3</i>     | <i>D1</i> | <i>R2; R3</i>     | 1 | 0 | 0 |
| 148 | <i>Pe1</i>            | <i>P3</i>         | <i>D2</i> | <i>R3</i>         | 1 | 1 | 0 |
| 149 | <i>Pe1</i>            | <i>P3</i>         | <i>D1</i> | <i>R3</i>         | 1 | 1 | 0 |
| 150 | <i>Pe1</i>            | <i>P3</i>         | <i>D1</i> | <i>R3</i>         | 1 | 1 | 0 |
| 151 | <i>Pe1; Pe2</i>       | <i>P2; P3</i>     | <i>D1</i> | <i>R2; R3</i>     | 1 | 1 | 1 |
| 152 | <i>Pe1; Pe2</i>       | <i>P2; P3</i>     | <i>D1</i> | <i>R2; R3</i>     | 1 | 0 | 0 |
| 153 | <i>Pe1; Pe2</i>       | <i>P2; P3</i>     | <i>D1</i> | <i>R2; R3</i>     | 1 | 0 | 0 |
| 154 | <i>Pe1; Pe2; Pe3;</i> | <i>P1; P2; P3</i> | <i>D1</i> | <i>R2; R3</i>     | 1 | 1 | 1 |
| 155 | <i>Pe1</i>            | <i>P3</i>         | <i>D1</i> | <i>R3</i>         | 1 | 0 | 0 |
| 156 | <i>Pe1; Pe2</i>       | <i>P2; P3</i>     | <i>D1</i> | <i>R2; R3</i>     | 1 | 0 | 0 |
| 157 | <i>Pe1</i>            | <i>P3</i>         | <i>D1</i> | <i>R3</i>         | 0 | 0 | 0 |
| 158 | <i>Pe1</i>            | <i>P3</i>         | <i>D1</i> | <i>R3</i>         | 1 | 0 | 0 |
| 159 | <i>Pe1</i>            | <i>P3</i>         | <i>D1</i> | <i>R3</i>         | 1 | 1 | 0 |
| 160 | <i>Pe1</i>            | <i>P3</i>         | <i>D1</i> | <i>R3</i>         | 0 | 0 | 0 |
| 161 | <i>Pe1</i>            | <i>P3</i>         | <i>D1</i> | <i>R3</i>         | 0 | 0 | 0 |
| 162 | <i>Pe1</i>            | <i>P3</i>         | <i>D1</i> | <i>R3</i>         | 0 | 0 | 0 |
| 163 | <i>Pe1</i>            | <i>P3</i>         | <i>D1</i> | <i>R3</i>         | 1 | 1 | 1 |
| 164 | <i>Pe1</i>            | <i>P3</i>         | <i>D1</i> | <i>R3</i>         | 0 | 0 | 0 |
| 165 | <i>Pe1</i>            | <i>P3</i>         | <i>D1</i> | <i>R3</i>         | 0 | 0 | 0 |
| 166 | <i>Pe1</i>            | <i>P3</i>         | <i>D1</i> | <i>R3</i>         | 0 | 1 | 0 |
| 167 | <i>Pe1</i>            | <i>P3</i>         | <i>D1</i> | <i>R3</i>         | 1 | 1 | 0 |
| 168 | <i>Pe1</i>            | <i>P3</i>         | <i>D1</i> | <i>R3</i>         | 1 | 0 | 0 |
| 169 | <i>Pe1</i>            | <i>P3</i>         | <i>D1</i> | <i>R3</i>         | 1 | 0 | 0 |
| 170 | <i>Pe1</i>            | <i>P3</i>         | <i>D1</i> | <i>R3</i>         | 1 | 0 | 0 |
| 171 | <i>Pe1</i>            | <i>P3</i>         | <i>D1</i> | <i>R3</i>         | 1 | 0 | 0 |
| 172 | <i>Pe1</i>            | <i>P3</i>         | <i>D1</i> | <i>R3</i>         | 1 | 1 | 0 |
| 173 | <i>Pe1</i>            | <i>P3</i>         | <i>D2</i> | <i>R3</i>         | 1 | 0 | 0 |
| 174 | <i>Pe1</i>            | <i>P3</i>         | <i>D2</i> | <i>R3</i>         | 1 | 0 | 0 |
| 175 | <i>Pe1</i>            | <i>P3</i>         | <i>D1</i> | <i>R3</i>         | 1 | 0 | 0 |
| 176 | <i>Pe1</i>            | <i>P3</i>         | <i>D2</i> | <i>R3</i>         | 1 | 0 | 0 |
| 177 | <i>Pe1</i>            | <i>P3</i>         | <i>D1</i> | <i>R3</i>         | 1 | 0 | 0 |
| 178 | <i>Pe1; Pe2; Pe3</i>  | <i>P1; P2; P3</i> | <i>D1</i> | <i>R1; R2; R3</i> | 0 | 0 | 0 |
| 179 | <i>Pe1</i>            | <i>P3</i>         | <i>D1</i> | <i>R3</i>         | 1 | 0 | 0 |
| 180 | <i>Pe1; Pe2</i>       | <i>P2; P3</i>     | <i>D1</i> | <i>R2; R3</i>     | 1 | 0 | 0 |
| 181 | <i>Pe1</i>            | <i>P3</i>         | <i>D2</i> | <i>R3</i>         | 1 | 1 | 0 |
| 182 | <i>Pe1; Pe2</i>       | <i>P2; P3</i>     | <i>D1</i> | <i>R2; R3</i>     | 0 | 0 | 0 |
| 183 | <i>Pe1</i>            | <i>P3</i>         | <i>D1</i> | <i>R3</i>         | 1 | 1 | 0 |
| 184 | <i>Pe1</i>            | <i>P3</i>         | <i>D1</i> | <i>R3</i>         | 1 | 1 | 0 |
| 185 | <i>Pe1</i>            | <i>P3</i>         | <i>D1</i> | <i>R3</i>         | 1 | 1 | 0 |
| 186 | <i>Pe1</i>            | <i>P3</i>         | <i>D1</i> | <i>R3</i>         | 1 | 1 | 0 |
| 187 | <i>Pe1</i>            | <i>P3</i>         | <i>D1</i> | <i>R3</i>         | 1 | 0 | 0 |
| 188 | <i>Pe1</i>            | <i>P3</i>         | <i>D1</i> | <i>R3</i>         | 1 | 0 | 0 |
| 189 | <i>Pe1</i>            | <i>P3</i>         | <i>D2</i> | <i>R3</i>         | 1 | 1 | 0 |
| 190 | <i>Pe1</i>            | <i>P3</i>         | <i>D1</i> | <i>R3</i>         | 0 | 0 | 0 |
| 191 | <i>Pe1</i>            | <i>P3</i>         | <i>D1</i> | <i>R3</i>         | 1 | 0 | 0 |

|     |                      |                   |           |                   |   |   |   |
|-----|----------------------|-------------------|-----------|-------------------|---|---|---|
| 192 | <i>Pe1</i>           | <i>P3</i>         | <i>D2</i> | <i>R3</i>         | 0 | 0 | 0 |
| 193 | <i>Pe1; Pe2</i>      | <i>P2; P3</i>     | <i>D1</i> | <i>R2; R3</i>     | 1 | 0 | 0 |
| 194 | <i>Pe1; Pe2</i>      | <i>P2; P3</i>     | <i>D1</i> | <i>R2; R3</i>     | 0 | 0 | 0 |
| 195 | <i>Pe1</i>           | <i>P3</i>         | <i>D1</i> | <i>R3</i>         | 0 | 0 | 0 |
| 196 | <i>Pe1</i>           | <i>P3</i>         | <i>D1</i> | <i>R3</i>         | 1 | 0 | 0 |
| 197 | <i>Pe1</i>           | <i>P3</i>         | <i>D1</i> | <i>R3</i>         | 1 | 0 | 0 |
| 198 | <i>Pe1</i>           | <i>P3</i>         | <i>D1</i> | <i>R3</i>         | 1 | 0 | 0 |
| 199 | <i>Pe1</i>           | <i>P3</i>         | <i>D2</i> | <i>R3</i>         | 1 | 0 | 0 |
| 200 | <i>Pe1</i>           | <i>P3</i>         | <i>D2</i> | <i>R3</i>         | 1 | 1 | 1 |
| 201 | <i>Pe1; Pe2</i>      | <i>P2; P3</i>     | <i>D1</i> | <i>R2; R3</i>     | 1 | 0 | 0 |
| 202 | <i>Pe1; Pe2</i>      | <i>P2; P3</i>     | <i>D1</i> | <i>R2; R3</i>     | 1 | 0 | 0 |
| 203 | <i>Pe1; Pe2</i>      | <i>P2; P3</i>     | <i>D1</i> | <i>R2; R3</i>     | 1 | 0 | 0 |
| 204 | <i>Pe1; Pe2</i>      | <i>P2; P3</i>     | <i>D1</i> | <i>R2; R3</i>     | 1 | 0 | 0 |
| 205 | <i>Pe1; Pe2</i>      | <i>P2; P3</i>     | <i>D1</i> | <i>R2; R3</i>     | 1 | 0 | 0 |
| 206 | <i>Pe1; Pe2</i>      | <i>P2; P3</i>     | <i>D1</i> | <i>R2; R3</i>     | 1 | 0 | 0 |
| 207 | <i>Pe1; Pe2</i>      | <i>P2; P3</i>     | <i>D1</i> | <i>R2; R3</i>     | 1 | 0 | 0 |
| 208 | <i>Pe1; Pe2</i>      | <i>P2; P3</i>     | <i>D1</i> | <i>R2; R3</i>     | 1 | 1 | 0 |
| 209 | <i>Pe1; Pe2; Pe3</i> | <i>P1; P2; P3</i> | <i>D1</i> | <i>R1; R2; R3</i> | 0 | 0 | 0 |
| 210 | <i>Pe1</i>           | <i>P3</i>         | <i>D1</i> | <i>R3</i>         | 0 | 0 | 0 |
| 211 | <i>Pe1; Pe2; Pe3</i> | <i>P1; P2; P3</i> | <i>D1</i> | <i>R1; R2; R3</i> | 0 | 0 | 0 |
| 212 | <i>Pe1; Pe2; Pe3</i> | <i>P1; P2; P3</i> | <i>D1</i> | <i>R1; R2; R3</i> | 0 | 0 | 0 |
| 213 | <i>Pe1</i>           | <i>P3</i>         | <i>D1</i> | <i>R3</i>         | 0 | 0 | 0 |
| 214 | <i>Pe1; Pe2; Pe3</i> | <i>P1; P2; P3</i> | <i>D1</i> | <i>R1; R2; R3</i> | 0 | 0 | 0 |
| 215 | <i>Pe1; Pe2; Pe3</i> | <i>P1; P2; P3</i> | <i>D1</i> | <i>R1; R2; R3</i> | 0 | 0 | 0 |
| 216 | <i>Pe1; Pe2; Pe3</i> | <i>P1; P2; P3</i> | <i>D1</i> | <i>R1; R2; R3</i> | 0 | 0 | 0 |
| 217 | <i>Pe1; Pe2; Pe3</i> | <i>P1; P2; P3</i> | <i>D1</i> | <i>R1; R2; R3</i> | 0 | 0 | 0 |
| 218 | <i>Pe1; Pe2; Pe3</i> | <i>P1; P2; P3</i> | <i>D1</i> | <i>R1; R2; R3</i> | 0 | 0 | 0 |
| 219 | <i>Pe1; Pe2; Pe3</i> | <i>P1; P2; P3</i> | <i>D1</i> | <i>R1; R2; R3</i> | 0 | 0 | 0 |

\*Rnatech node is calculated according to the matrix of Section 2.1.3
